# Supplementary material
Source: PubMed Central journal article supplement (PMC5323433)

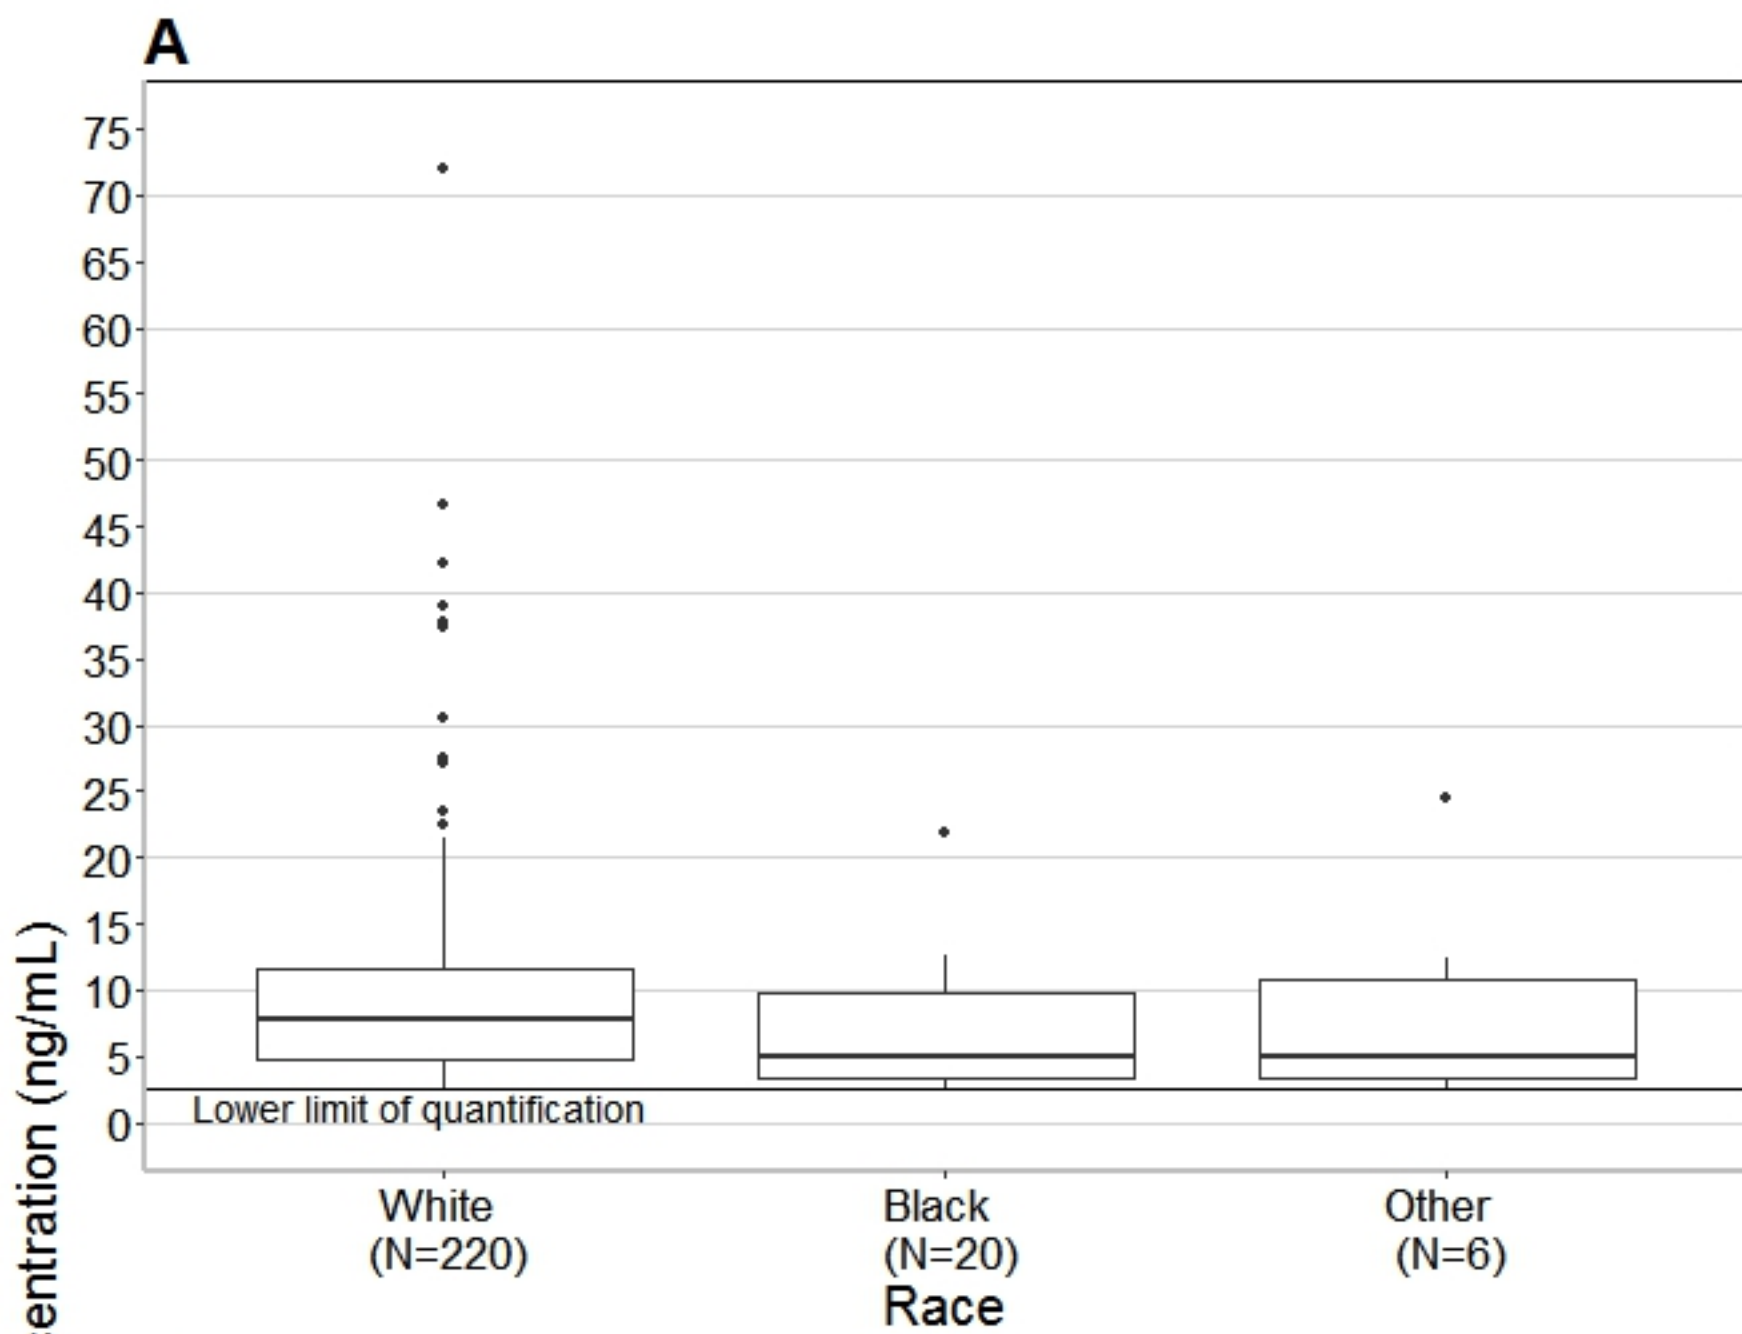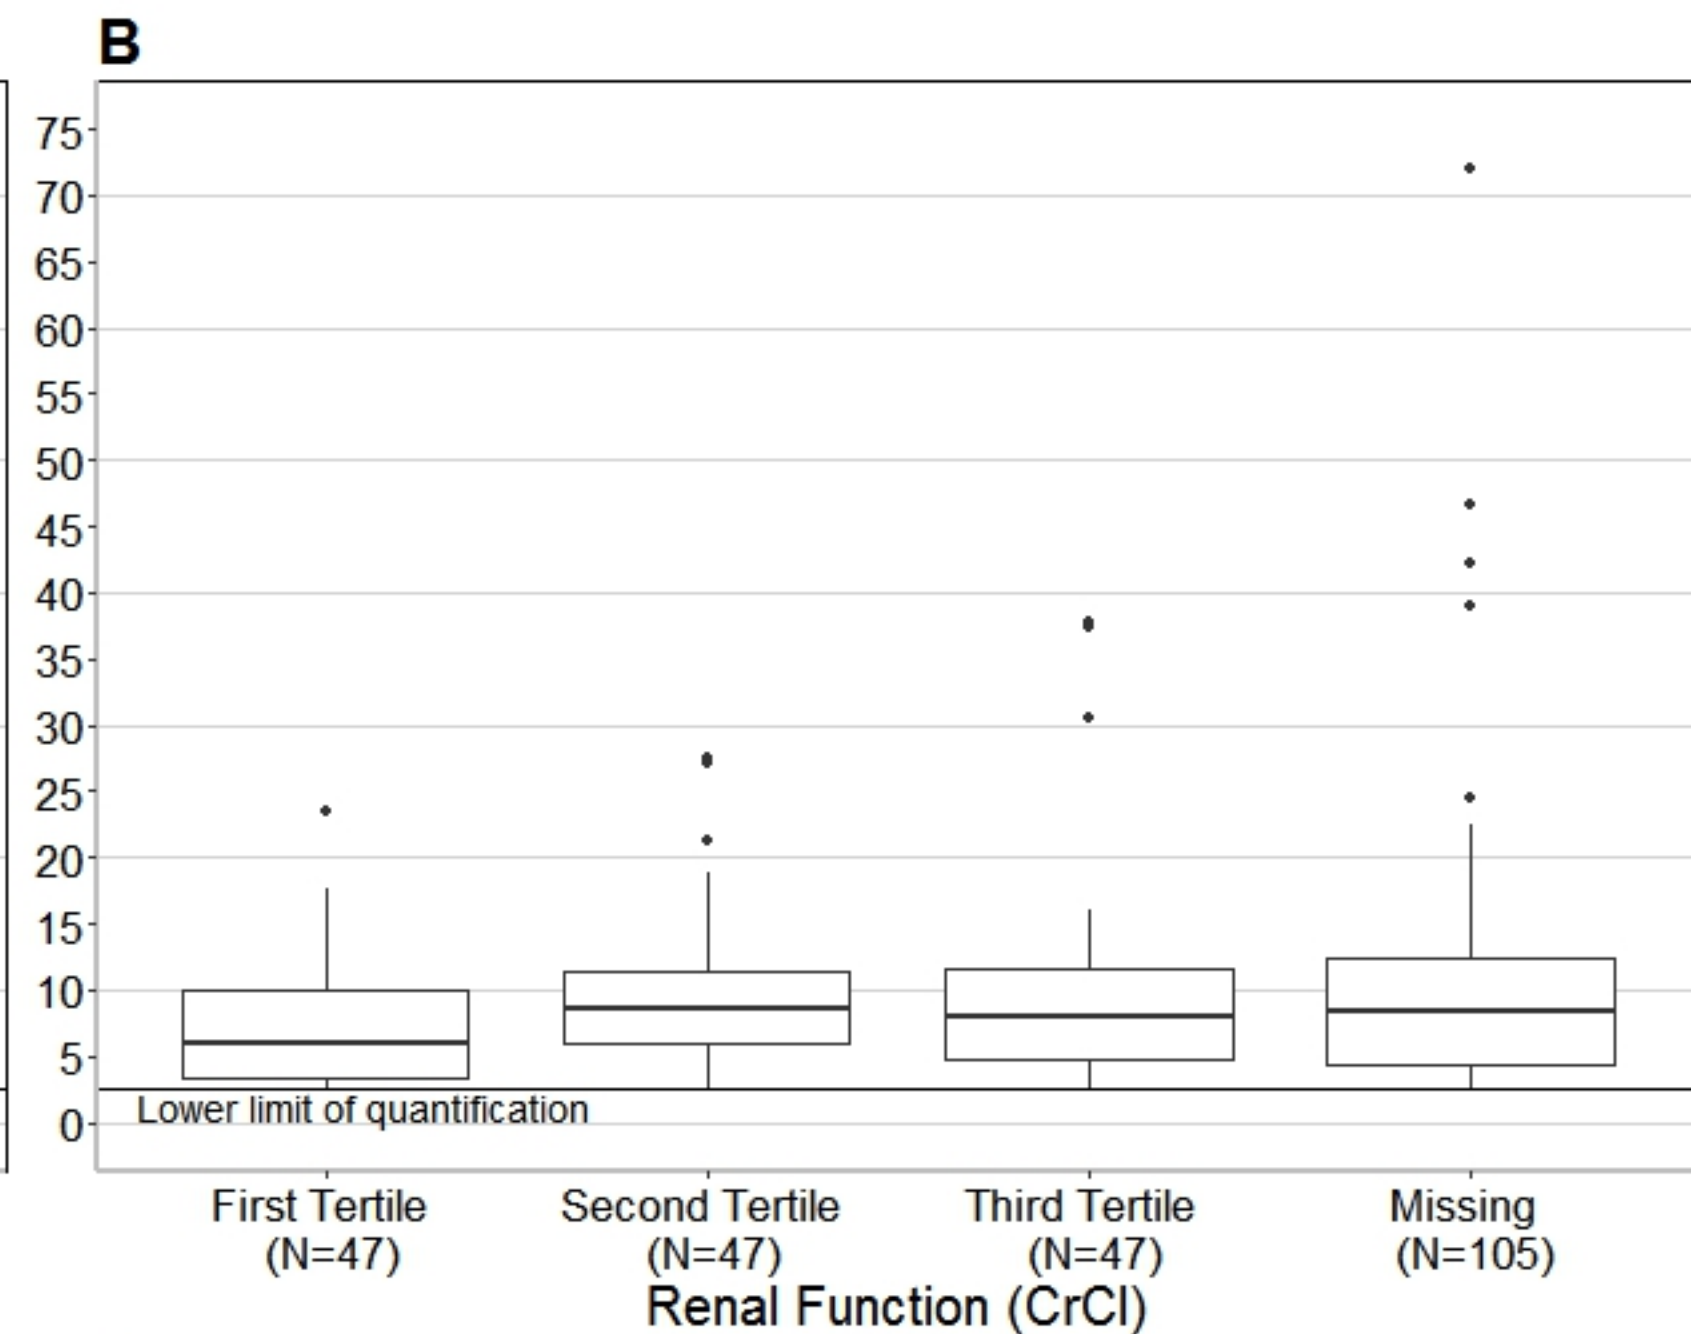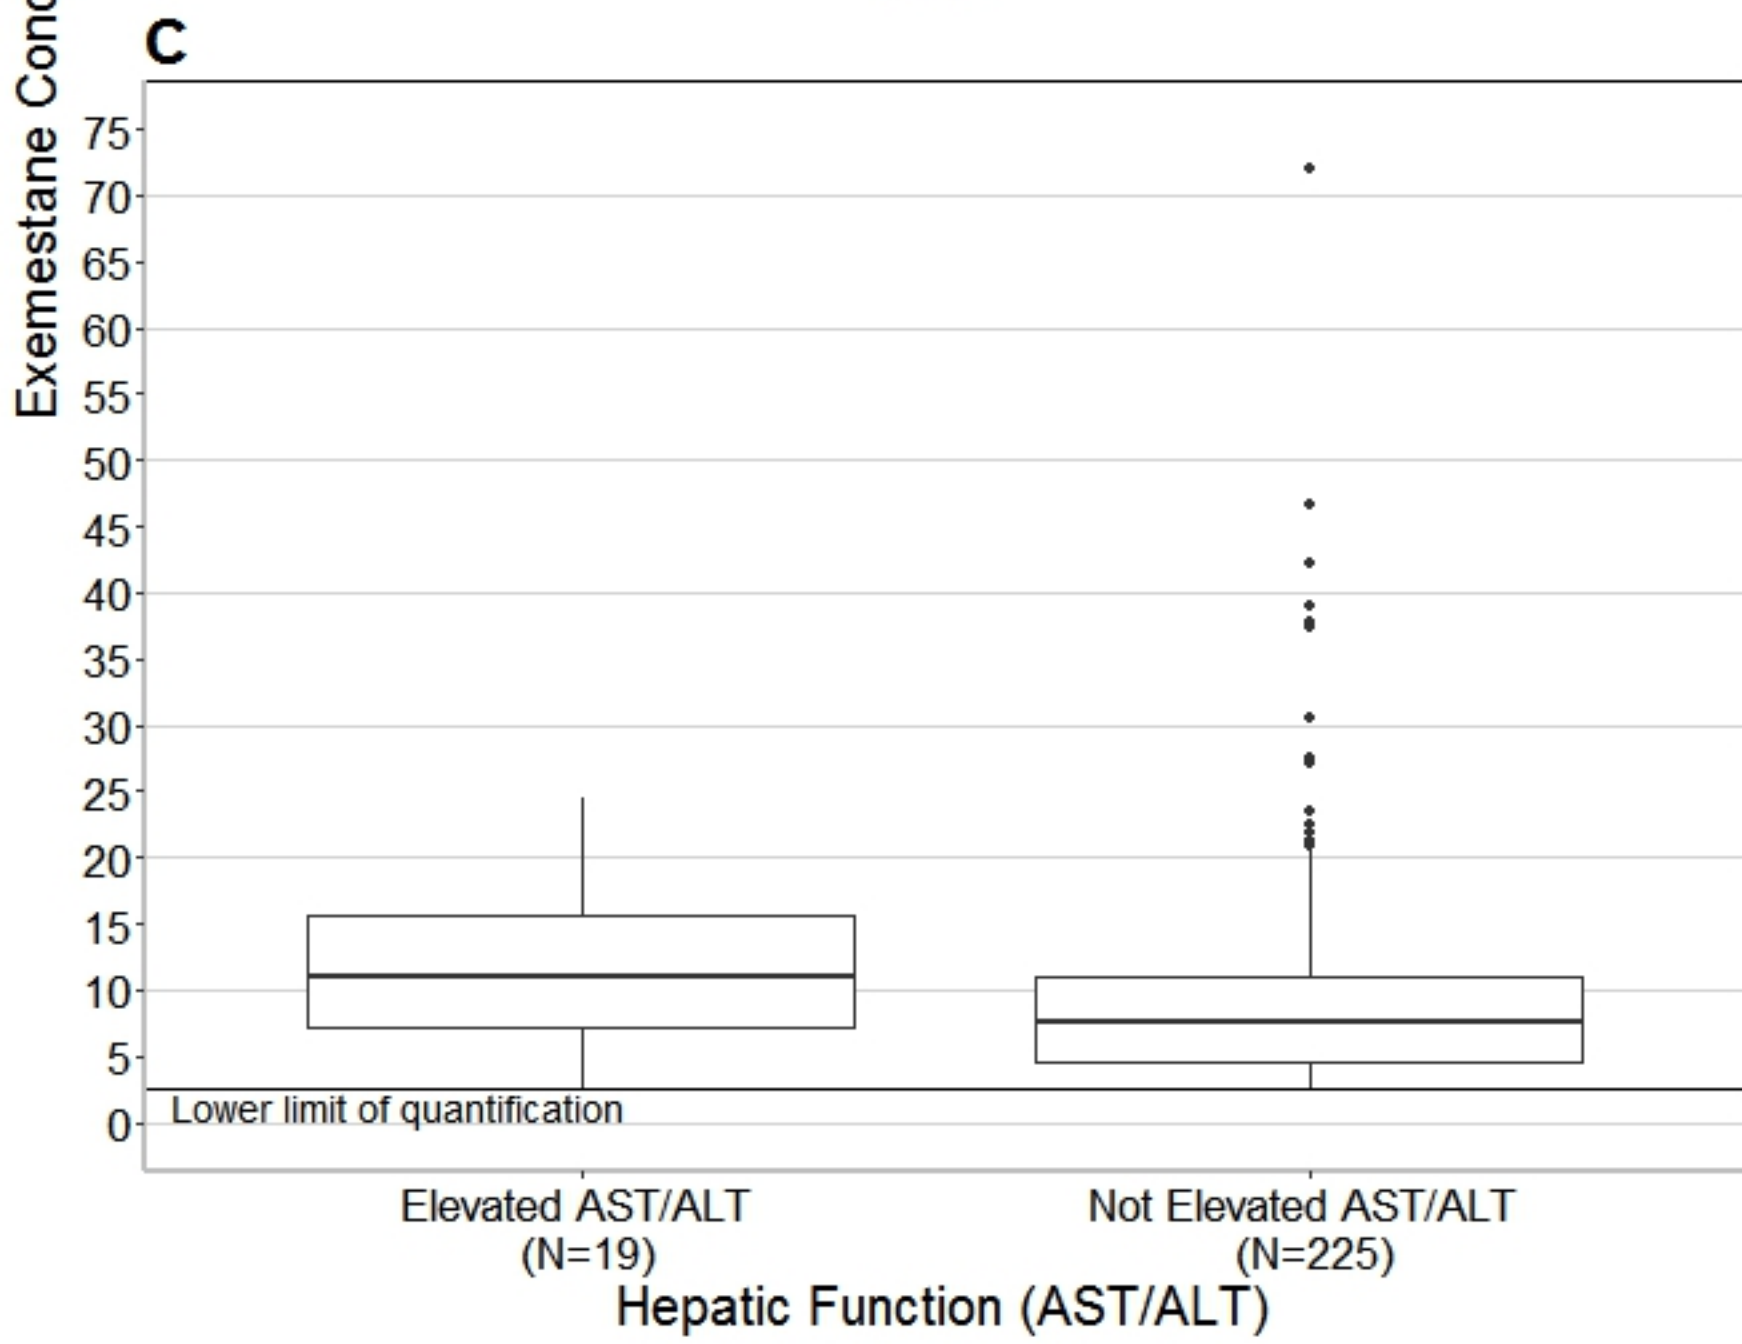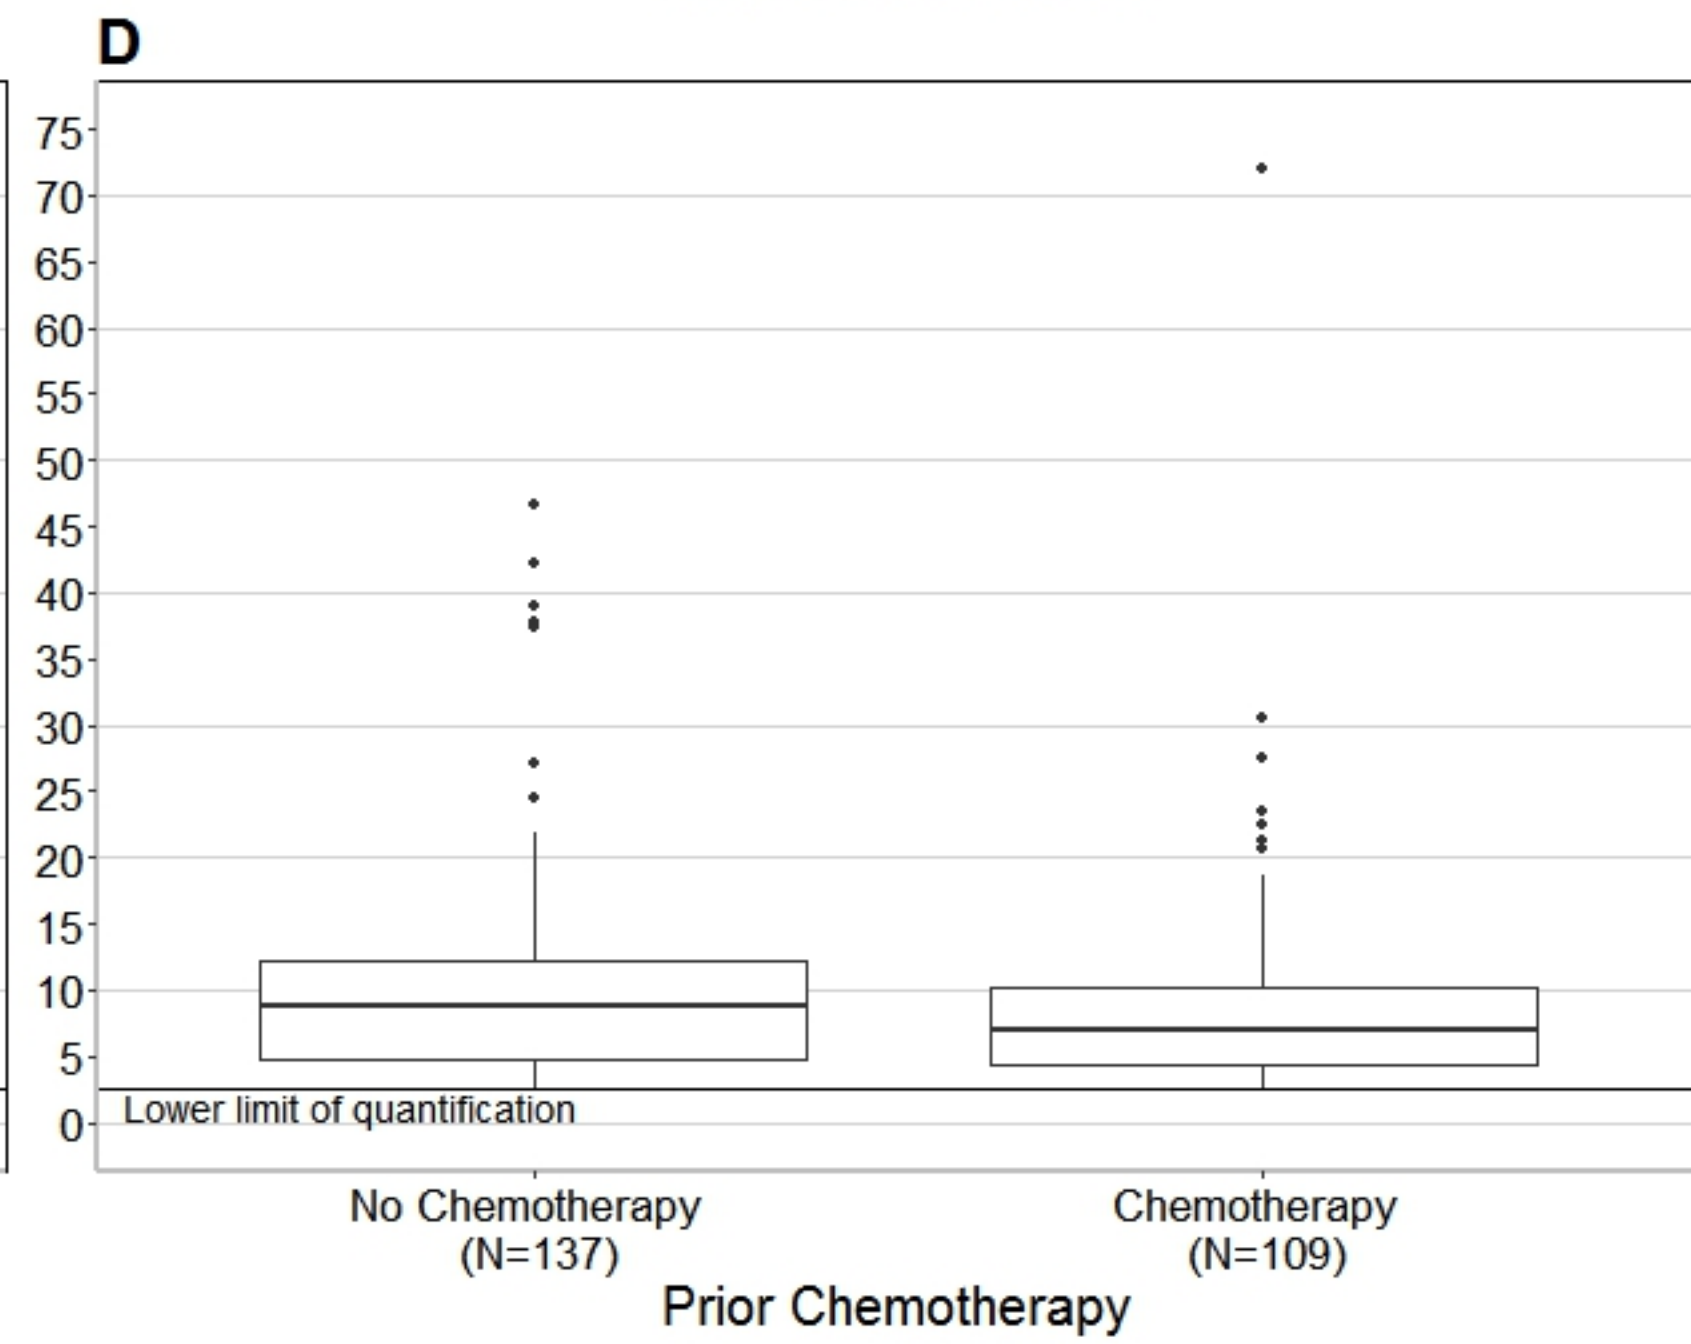

Supplement: NIHMS796213-supplement-supp_fig1.pdf [file NIHMS796213-supplement-supp_fig1.pdf]
